# Supplementary material
Source: PubMed Central journal article supplement (PMC4044835)
Supplement: supp_pp.114.239335_239335Supplemental_Figure_3.pdf [file supp_pp.114.239335_239335Supplemental_Figure_3.pdf]

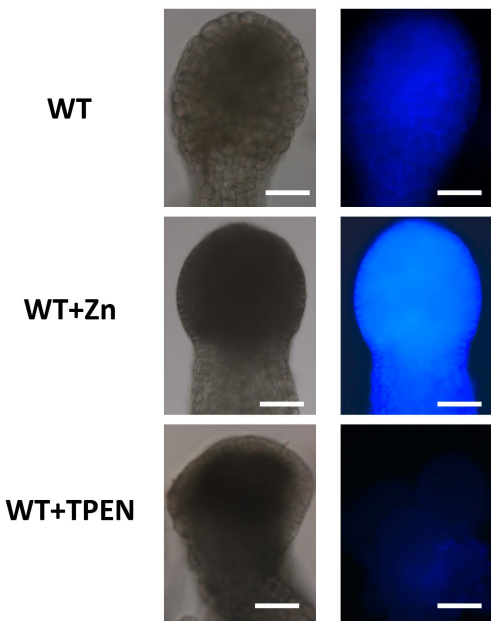

**Supplemental Figure 3.** Detection of Zn<sup>2+</sup> in maize embryos by Zinquin. Localization of Zn<sup>2+</sup> in WT developing embryos cultured for 7 days in the P medium supplemented with 300 μM ZnSO<sub>4</sub> (Zn<sup>2+</sup>) or with 5 μM of the Zn<sup>2+</sup> chelator TPEN. See material and methods for details. Scale bars = 30 μm
