# Supplementary material
Source: PubMed Central journal article supplement (PMC4044835)
Supplement: supp_pp.114.239335_239335Supplemental_Figure_4.pdf [file supp_pp.114.239335_239335Supplemental_Figure_4.pdf]

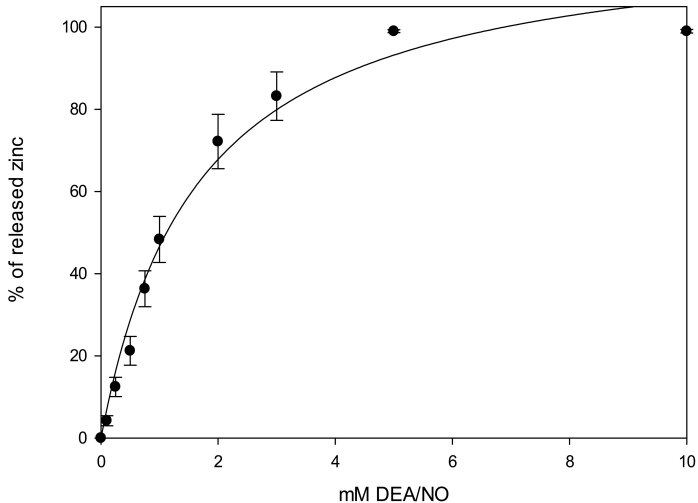

**Supplemental Figure 4. Effects of increasing concentrations of the NO donor (DEA/NO) on the release of  $Zn^{2+}$  from a constant concentration of recombinant ZmMT4 protein (see Table 1). Values  $\pm$ SE are means of three biological replicates.**
