# Supplementary material
Source: PubMed Central journal article supplement (PMC4044835)
Supplement: supp_pp.114.239335_239335Supplemental_Figure_6.pdf [file supp_pp.114.239335_239335Supplemental_Figure_6.pdf]

**A**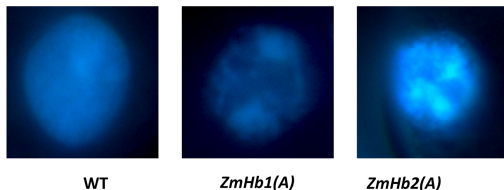**B**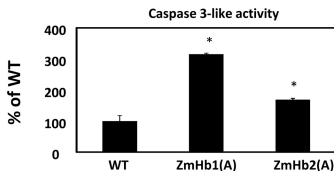**C**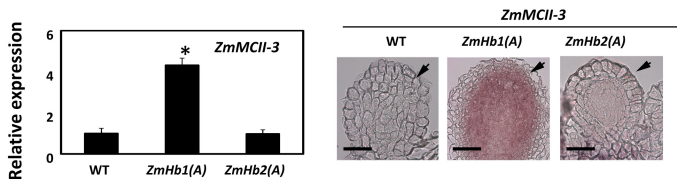

**Supplemental Figure 6. Cytological and molecular hallmarks of PCD in *ZmHb*-suppressing embryos.** (A) Nuclear fragmentation in cells targeted by PCD in immature (day 7, P medium) embryos. (B) Caspase 3- like activity in immature (day 7, P medium) embryos. \* Statistically significant difference ( $p \leq 0.05$ ) from WT set at 100%. (C) Expression levels of *metacaspase II-3* in the transgenic lines. Values are means  $\pm$  SE of three biological replicates and are normalized to the WT value set at 1. \* Statistically significant difference ( $p \leq 0.05$ ) from WT. Localization of *metacaspase II-3* in the WT, *ZmHb1(A)*, and *ZmHb2(A)* lines. Arrows indicate the apical domain of the embryos. Note that the *metacaspase*-expressing domains coincide with those suppressing *Hbs* (Figure 1C) and accumulating NO and  $Zn^{2+}$  (Figure 1E). Scale bars = 30  $\mu$ m. *Metacaspase* expression and localization studies were conducted in immature (day 7, P medium) embryos.
