# Supplementary material
Source: PubMed Central journal article supplement (PMC4044835)
Supplement: supp_pp.114.239335_239335Supplemental_Figure_7.pdf [file supp_pp.114.239335_239335Supplemental_Figure_7.pdf]

WT

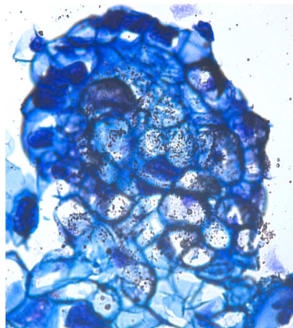

*ZmHb1 (A)*

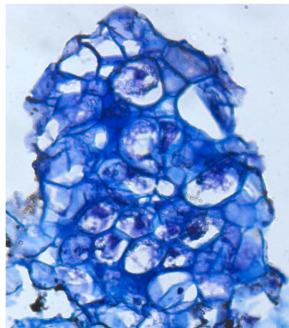

*ZmHb2(A)*

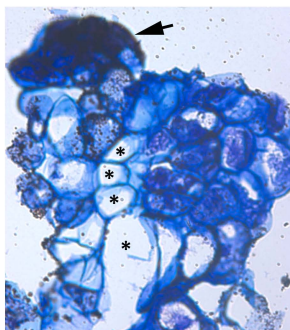

**Supplemental Figure 7.** Localization of reduced ascorbic acid (ASC) in immature (day 7, P medium) maize embryos produced by the WT line and *ZmHb1(A)* and *ZmHb2(A)* lines. Small silver grains denote accumulation of ASC. \* show cells devoid of silver grains. Arrow indicates a developing embryo originating from the surface of the embryogenic tissue. Scale bars = 15  $\mu$ m
