# Supplementary material
Source: PubMed Central journal article supplement (PMC4044835)
Supplement: supp_pp.114.239335_239335Supplemental_Figure_8.pdf [file supp_pp.114.239335_239335Supplemental_Figure_8.pdf]

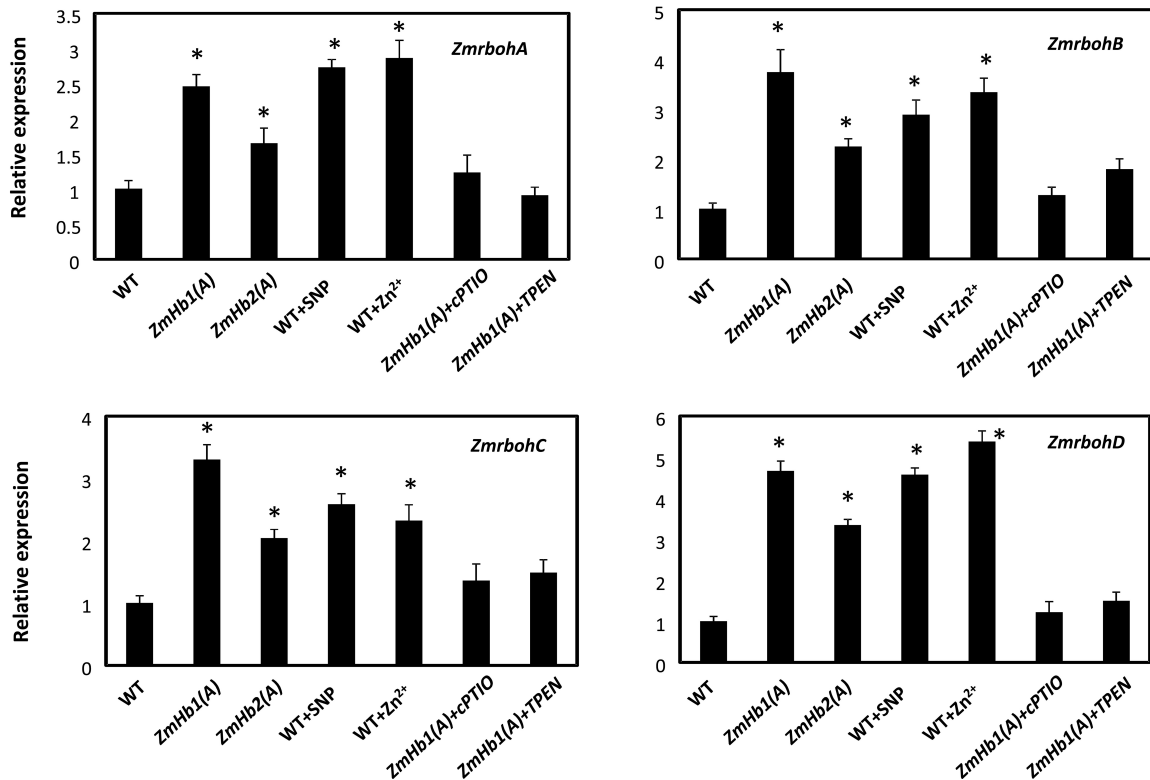

**Supplemental Figure 8. Expression level of the four respiratory burst oxidase homologs (*ZmrbohA-D*) in immature embryos (day 7, P medium) produced from the WT and *ZmHb1(A)* and *ZmHb2(A)* lines. The embryos were cultured with different levels of NO and Zn<sup>2+</sup> using compounds from Figure 3. Values are means  $\pm$  SE of three independent biological replicates and are normalized to the WT set at 1. \* Statistically significant difference ( $p \leq 0.05$ ) from WT.**
